# Supplementary material for: Targeted removal of epigenetic barriers during transcriptional reprogramming
Source: PubMed Central journal article supplement (PMC6509258; doi:10.1038/s41467-019-10146-8), 2019-05-09
Supplement: 41467_2019_10146_MOESM1_ESM.pdf [file 41467_2019_10146_MOESM1_ESM.pdf]

# **Targeted removal of epigenetic barriers during transcriptional reprogramming**

Baumann et al.

Supplementary Information

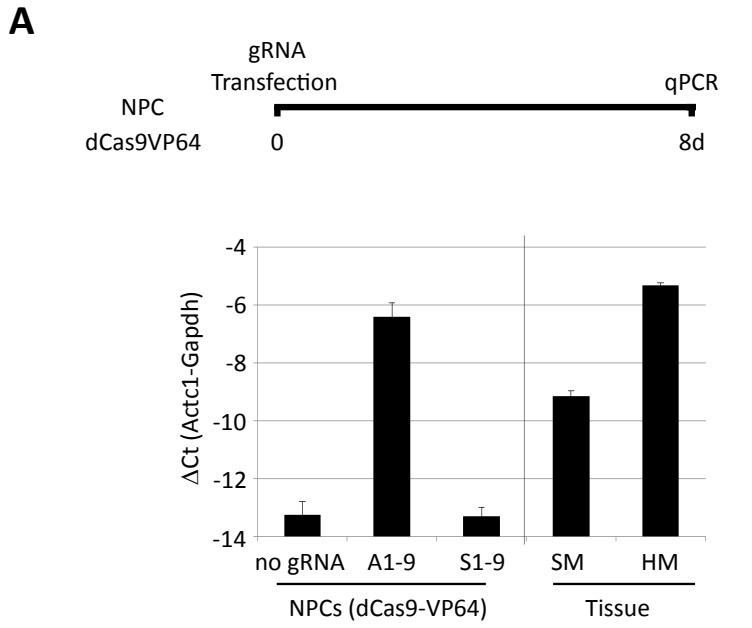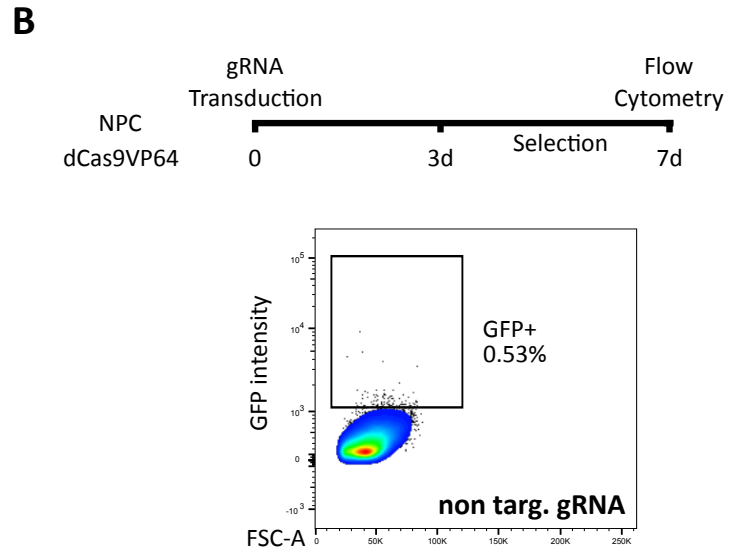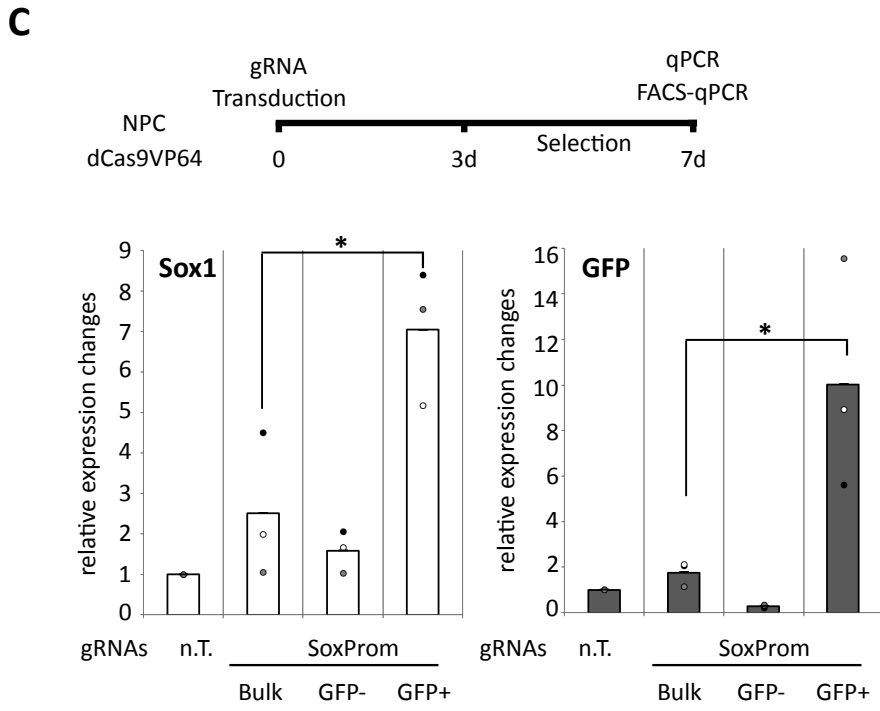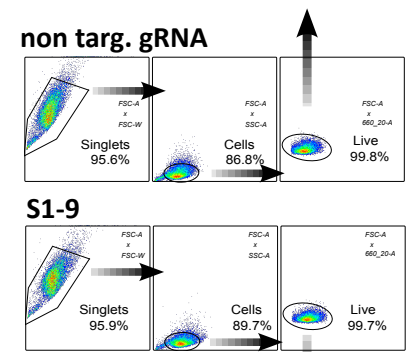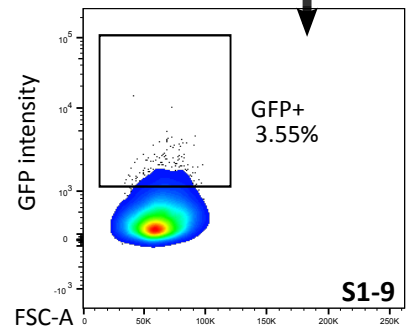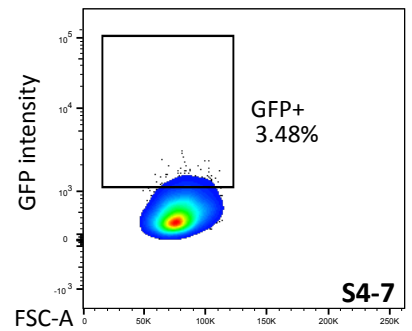

### Supplementary Figure 1:

(A) Significant induction of *Actc1* in NPCs using transcriptome engineering.  $\Delta\text{Ct}$  values ( $\text{Ct:Actc1} - \text{Ct:Gapdh}$ ) indicative of mRNA levels are shown for NPCs with and without *Actc1* induction using dCas9-VP64 and compared to  $\Delta\text{Ct}$  derived from heart (HM) and skeletal muscle tissue (SM) of 12-month-old mice, in which *Actc1* is naturally expressed. Data shown as the mean and standard error of the mean of  $n = 3$  biological replicates.

(B) Flow cytometry reveals a small population of responsive cells. Non-targeting gRNAs were transduced into  $\text{Sox1}^{\text{GFP}}$  NPCs, and cells were selected for gRNA expression. Flow analysis of cells reveals that some but not all cells respond to transcriptional activation with higher GFP fluorescence. Different gRNA pairs (S1-9, S4-7) activate comparable fractions of cells (see also Figure 1D), while cells transduced with non-targeting gRNAs resemble non-transduced cells. gRNA lentiviruses were transduced into  $\text{Sox1}^{\text{GFP}}$  NPCs (MOI = 4), and cells were selected for gRNA expression.

(C) GFP and *Sox1* mRNA are elevated in cells sorted from the GFP-positive gate.  $\text{Sox1}^{\text{GFP}}$ -positive and -negative cells were sorted from the dCas9-VP64 activated population; mRNA levels of GFP and *Sox1* were quantified in unsorted (n.T., non-targeting; Bulk, unsorted cells transduced with SoxProm gRNAs) and sorted populations. The significantly higher mRNA levels in the GFP-positive population compared to the Bulk population indicate an enrichment of responsive cells. Data shown as independent biological replicates, as well as the mean (bar graphs); \*  $p < 0.05$  in Student's t-test;  $n = 3$  biological replicates, performed on different days in different clonal lines.

**A**

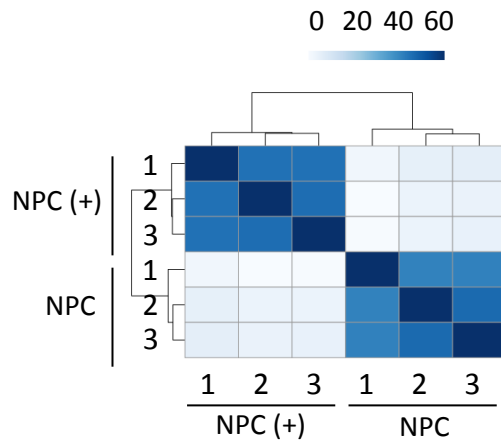

**B**

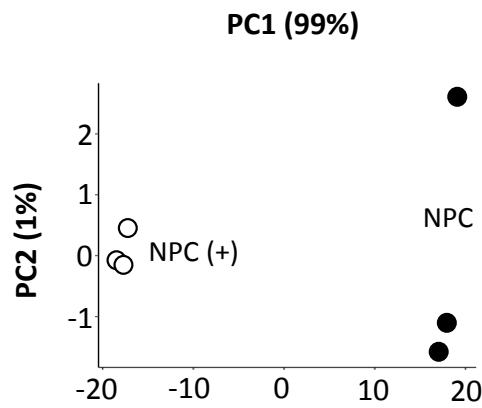

**D**

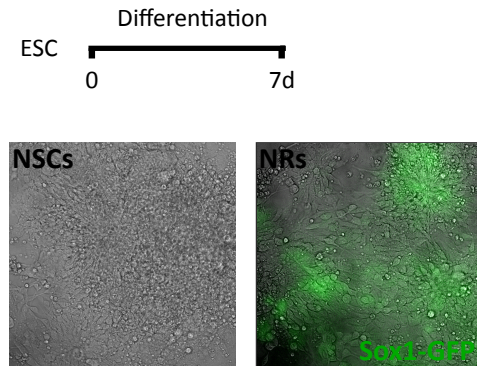

**C**

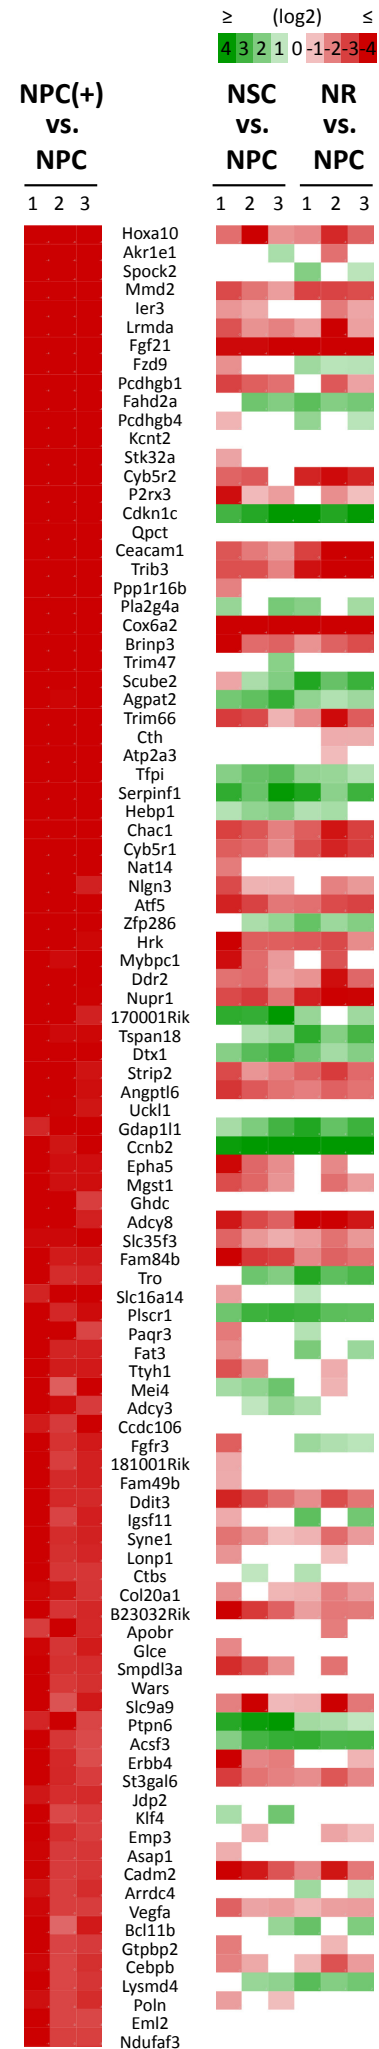

**Supplementary Figure 2:**

(A+B) RNAseq reveals significant changes in gene expression patterns after Sox1 upregulation. Heatmap and PC analysis of the transcriptomes of *Sox1*<sup>GFP</sup>-positive NPCs (+) and controls (NPCs); two clusters arise, separating the two populations.

(C) Heatmap comparing gene expression changes of Sox1-positive (+) and -negative NPCs, NSCs and NRs. Log2 fold changes of the 100 most significantly downregulated genes in Sox1-positive cells are shown for all replicates. Data were collected from three biological replicates each.

(D) Exemplary pictures of NSCs and NRs after 7 days of neural differentiation from ESCs.

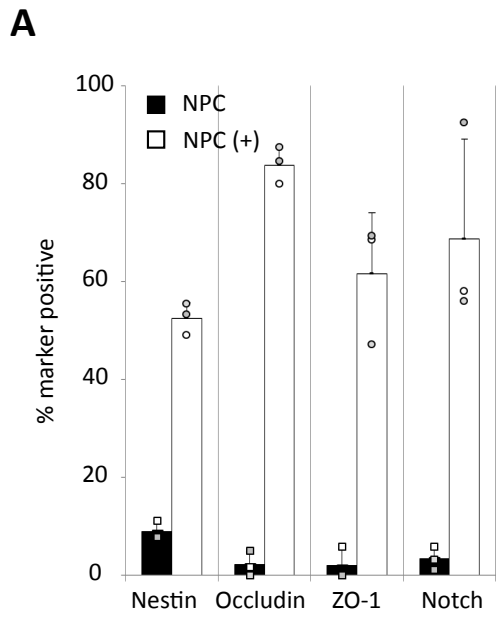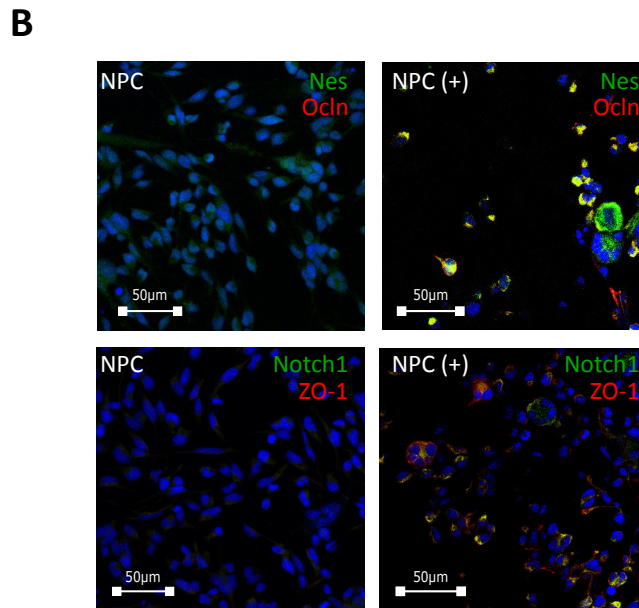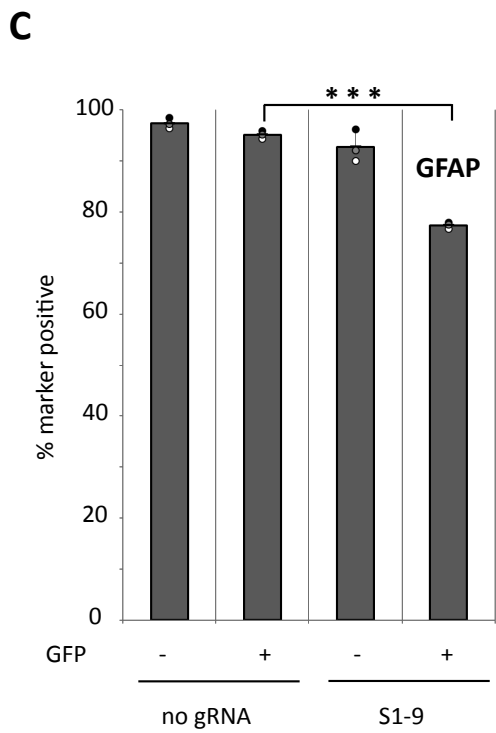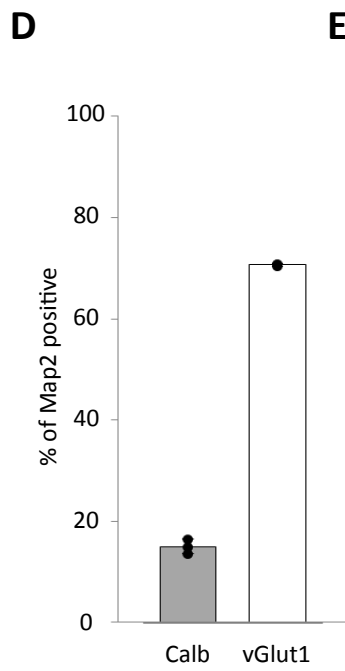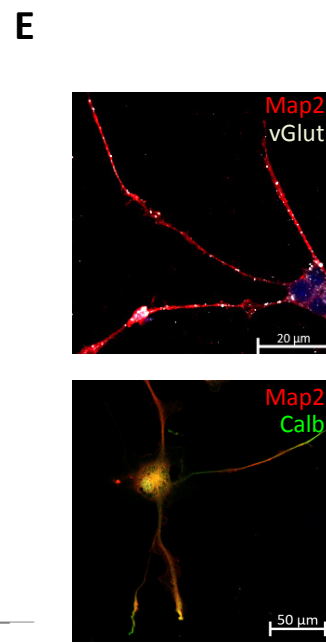

### Supplementary Figure 3:

(A+B) Sox1-positive NPCs express neuroepithelial markers. NPCs transduced with S1-9 gRNAs and sorted for *Sox1*<sup>GFP</sup> expression were immunostained for the neuroepithelial markers Ocln and Zo-1, as well as for the neural stem cell markers Nestin and Notch1. *Sox1*<sup>GFP</sup>-positive cells express these markers more frequently. Data shown as the mean + SEM. n = 3 biological replicates, performed on different days in different clonal lines.

(C) Differentiation reveals changes in the potency of Sox1-positive NPCs. After gRNA transduction, GFP-positive and -negative cells were sorted from both control (no gRNA) and activated (S1-9) populations and differentiated for 7 days; the number of cells positive for the glial marker Gfap decreased significantly in differentiating *Sox1*<sup>GFP</sup>-positive cells; \*\*\* p < 0.001 in Student's t-test; n = 3 biological replicates, performed on different days in different clonal lines.

(D) The majority of neurons differentiated from Sox1-positive NPCs have glutamatergic features. *Sox1*-targeting gRNAs (S1-9) were transduced into *Sox1*<sup>GFP</sup> NPCs. *Sox1*<sup>GFP</sup>-positive cells were sorted for GFP expression 7 days later and differentiated for 21 more days to allow neurons to mature. Immunocytochemistry for neuronal subtype specific markers reveals that approximately 70% of Map2-positive neurons were also positive for vGlut1, while approximately 15% showed Calbindin expression. Data shown as the mean and standard error of the mean of n = 3 biologic replicates, performed on different days in different clonal lines.

(E) Mature neurons differentiated from *Sox1*<sup>GFP</sup> positive NPCs. Images show examples of three vGlut1/Map2 double-positive neurons (top) and a Calbindin/Map2 double-positive neuron (bottom).

**A**

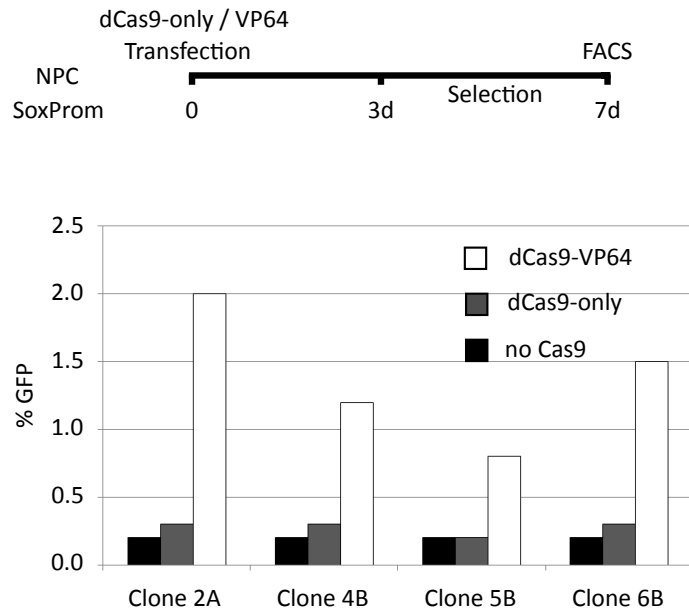

**B**

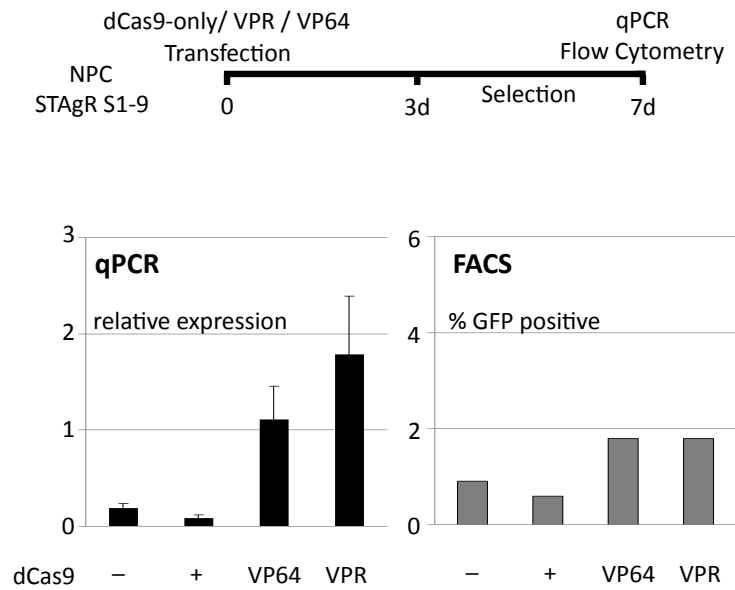



#### **Supplementary Figure 4**

(A) Clonal gRNA expressing NPC lines indicate no drastic impact of gRNA transduction on the responsiveness to *Sox1* trans-activation. dCas9-VP64 or only dCas9 were transfected into different clonal lines, stably expressing *Sox1* targeting gRNAs (SoxProm). Flow cytometry shows that no clonal line failed to respond entirely, while neither did one responded in a high proportion, indicating that gRNA expression and delivery might be negligible in this context.

(B) Biological replicate for data shown in Figure 3 D.

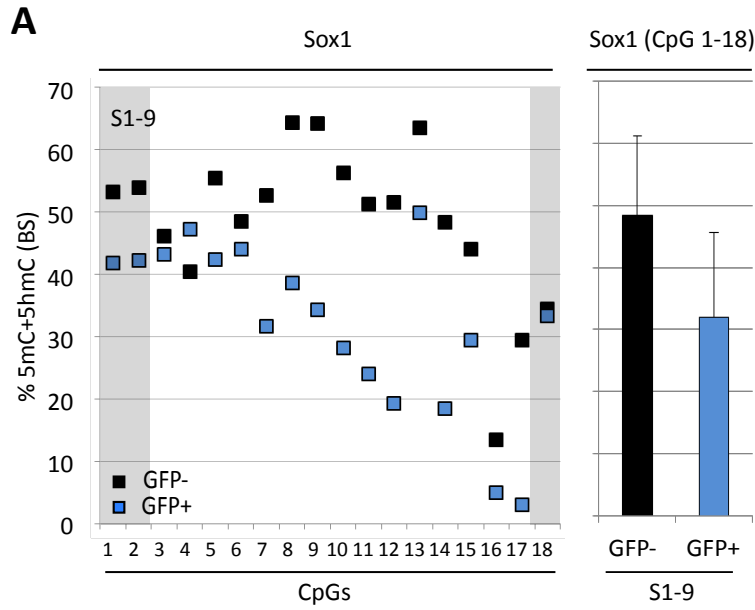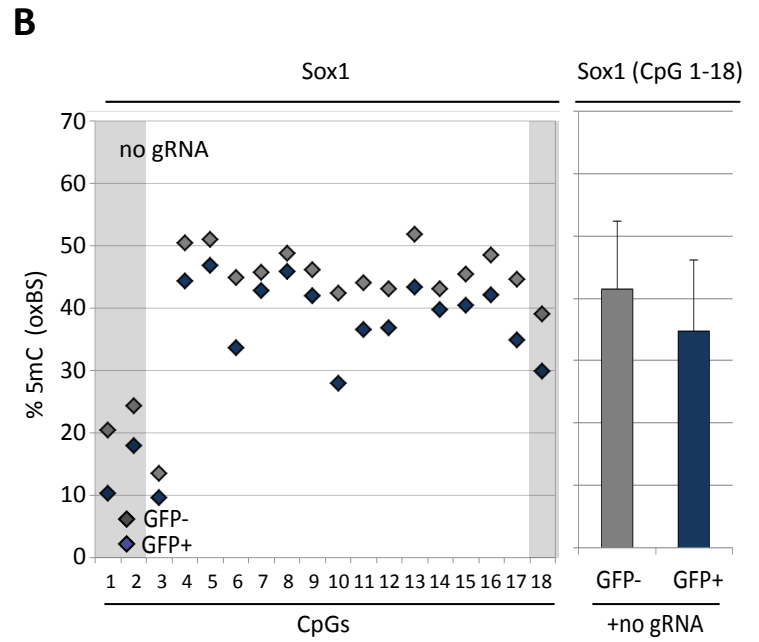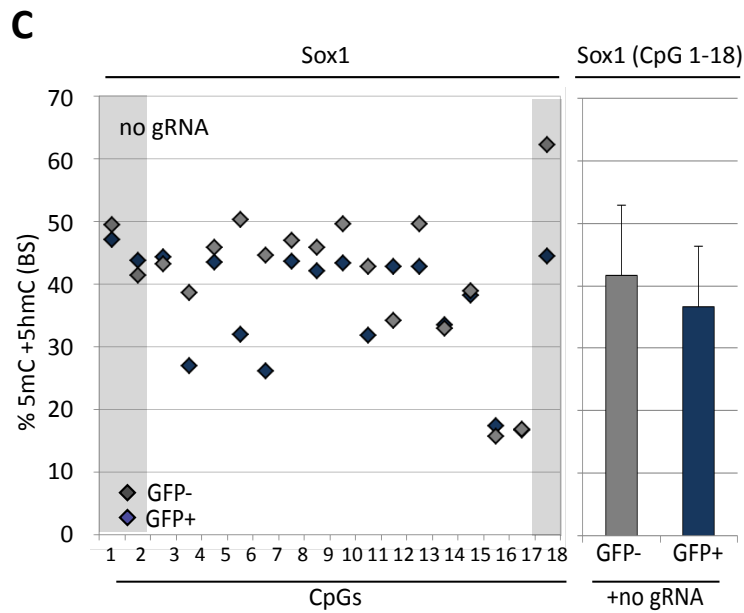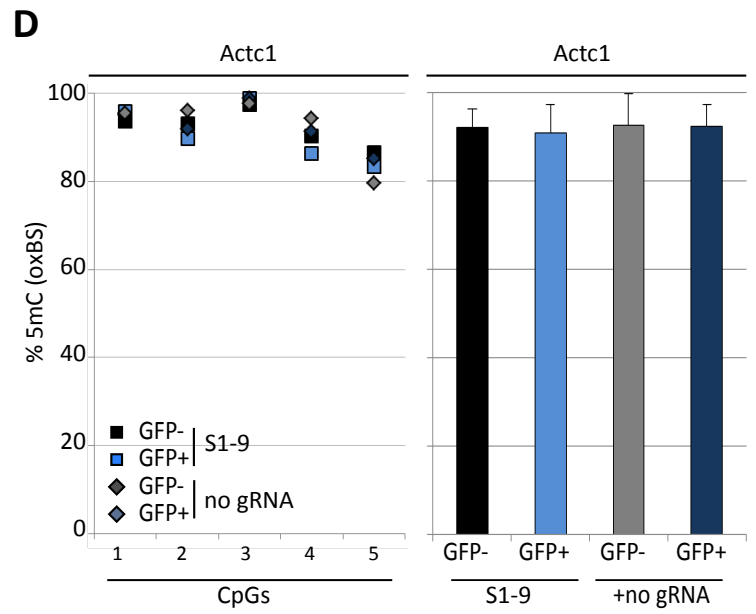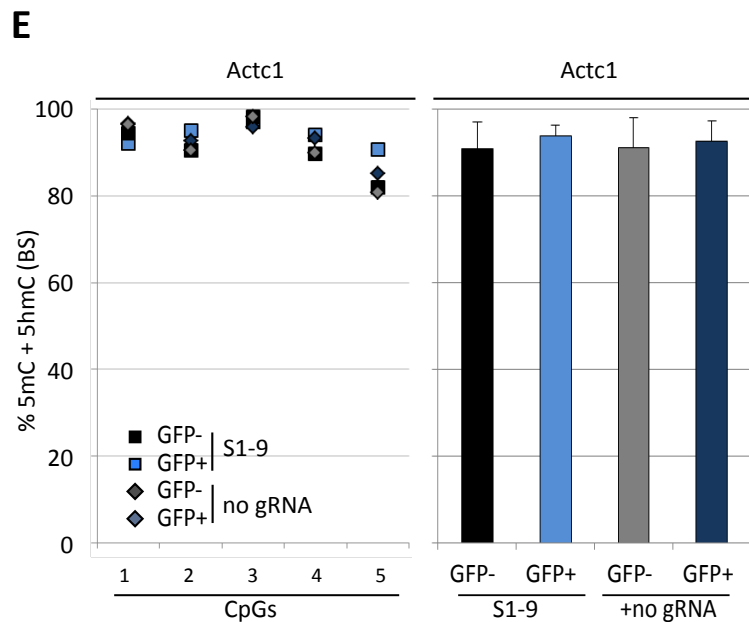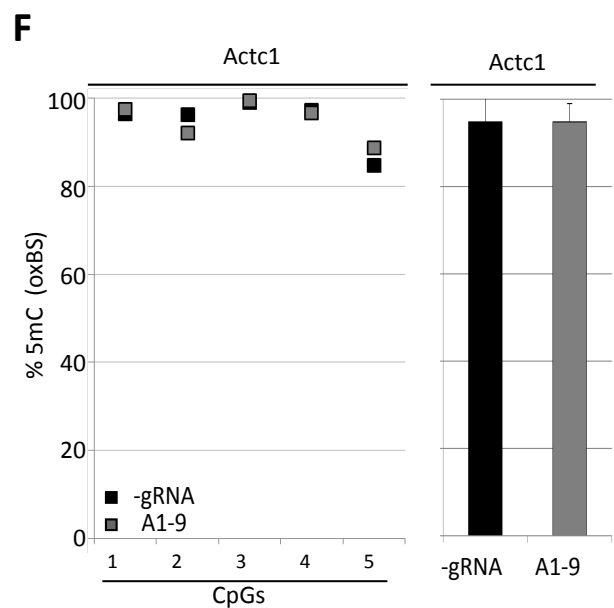

## Supplementary Figure 5

(A) Bisulfite sequencing corresponding to oxidative bisulfite sequencing in Figure 3G. Data shown as the mean (dot plot) and mean and standard error of the mean of all CpGs (bar graph) of n = 2 biological replicates of experiments performed on different days.

(B) Oxidative bisulfite and (C) bisulfite sequencing of sorted cell populations without gRNAs. No differences in DNA methylation and/or hydroxyl-methylation were apparent.

(D+E) No significant changes in DNA methylation and/or hydroxyl-methylation were seen at a control locus (*Actc1* promoter) when *Sox1* was targeted with dCas9-VP64 and/or when *Sox1*<sup>GFP</sup>-positive and -negative fractions were analyzed, indicating no global changes in DNA modifications in these populations. Data shown as the mean (dot plot) and mean and standard error of the mean of all CpGs (bar graph) of n = 2 biological replicates of experiments performed on different days.

(F) No differences in DNA methylation at the *Actc1* promoter were detected after the transcriptional induction of *Actc1*. After transfection of gRNAs targeting *Actc1*, oxidative bisulfite sequencing was performed on transfected and untransfected cells. No difference in the level of DNA methylation could be observed, indicating that transcriptional engineering does not automatically result in local DNA de-methylation. Data shown as the mean (dot plot) and mean with standard error of the mean of all analyzed CpGs (bar graph) from n = 2 biological replicates. Analysis was performed on different days.

**A**

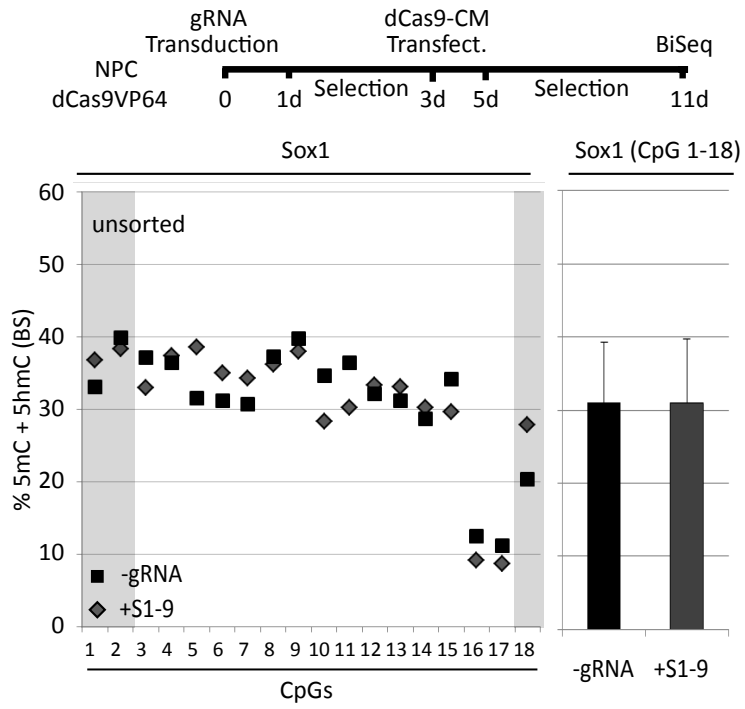

**B**

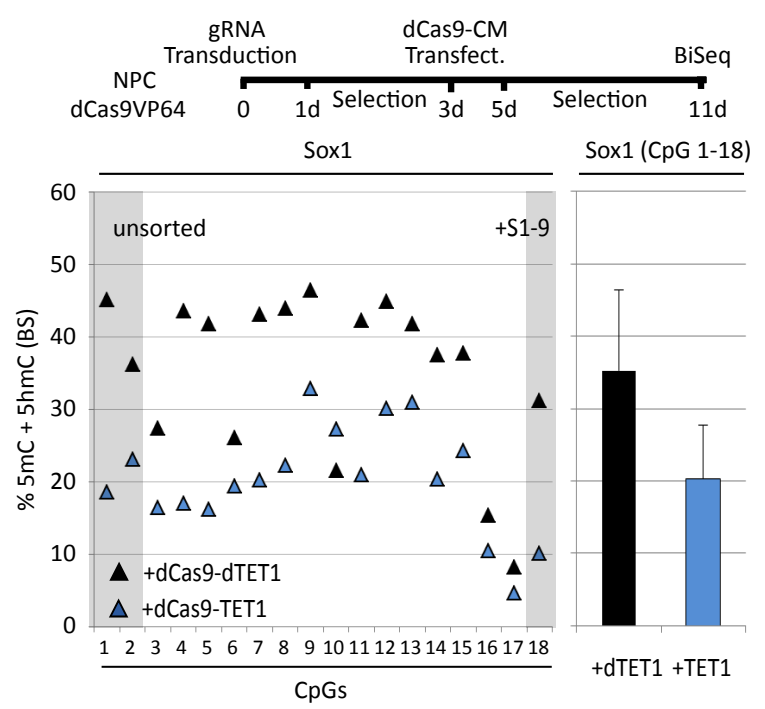

**C**

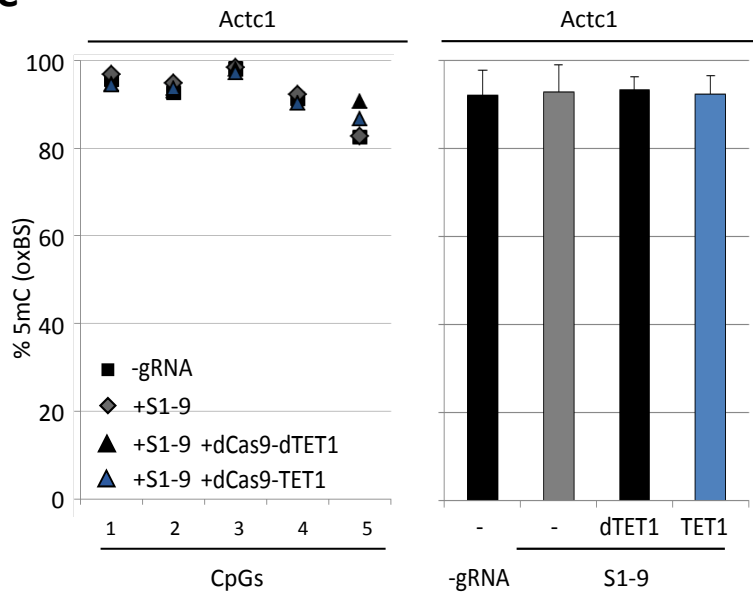

**D**

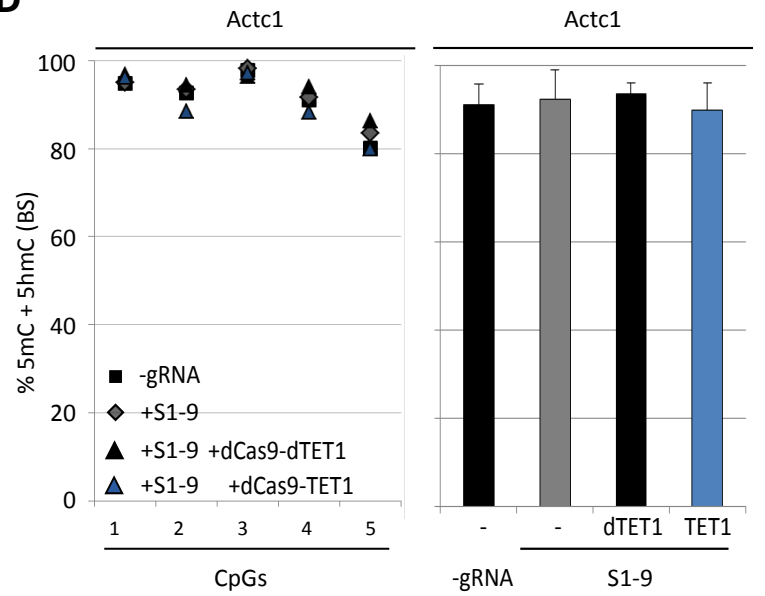

**E**

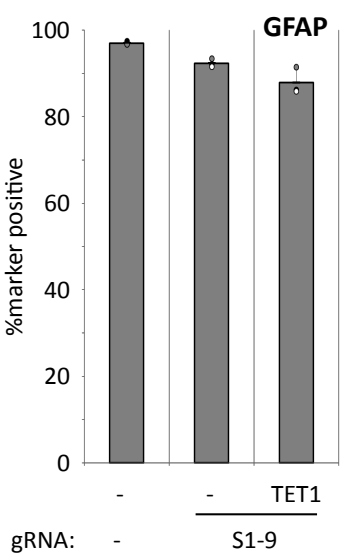

**Supplementary Figure 6:**

(A+B) Bisulfite sequencing corresponding to oxidative bisulfite sequencing in Figures 5 C and D. Data shown as the mean (dot plot) and mean and standard error of the mean of all CpGs (bar graph) of n = 4 biological replicates of experiments performed on different days.

(C+D) DNA methylation at the *Actc1* locus was analyzed in all samples shown in Figure 4C and D as an intrinsic control. No significant differences in DNA methylation and/or hydroxyl-methylation were detected.

(E) Differentiation assays revealed changes in the potency of Sox1-positive NPCs after DNA de-methylation. Cells were differentiated for 7 days; the number of cells positive for the glial marker Gfap has been quantified (n = 3 biological replicates, performed and analyzed independently on different days).

## Supplementary Tables

Supplementary Table 1: Primer Sequences

| Primer name              | Sequence                                                       |
|--------------------------|----------------------------------------------------------------|
| Hygro_1fwd               | AGTCAATAATCAATGTCAACCGGGTAGGGGAGGCG                            |
| Hygro_1rev               | GGTGGGCGAAGAACTCTCGGCATCTACTCTATTCCTTTG                        |
| Hygro_2fwd               | GAATAGAGTAGATGCCGAGAGTTCTTCGCCACCCC                            |
| Hygro_2rev               | AAGTGCCACCTGACGTCGACGGGTATACAGACATGATAAGATACATTGATGA           |
| P300_fwd                 | CGATGACAAGGCTGCAGGAGGCGGAGGTAGCAAAGAAAATAAGTTTTCTGC<br>TAAAAGG |
| P300_rev                 | GCTGATCAGCGGGTTTTTCAGCATTATTGCAGGTGTAGACAAA                    |
| Set7_fwd                 | CGATGACAAGGCTGCAGGAGGCGGAGGTAGCTTCTTCTTTGATGGCAGCACC           |
| Set7_rev                 | GCTGATCAGCGGGTTTTCACTTTTGCTGGGTGGCC                            |
| Tet1_fwd                 | CGATGACAAGGCTGCAGGAGGCGGAGGTAGCGAACTGCCACCTGCAGCTG             |
| Tet1_int_rev             | GGCAGTGACGAAGGCTTACT                                           |
| Tet1_int_fwd             | AGTAAGCCTTCGTCACTGC                                            |
| Tet1_rev                 | GCTGATCAGCGGGTTTTTCAGACCCAATGGTTATAGG                          |
| JMJD2a_fwd               | CGATGACAAGGCTGCAGGAGGCGGAGGTAGCGCTTCTGAGTCTGAAACTCTG<br>AATCC  |
| JMJD2a_rev               | GCTGATCAGCGGGTTTTTCATGCTTCTGGCGTGGGCAG                         |
| Tet1_mut_fwd             | GTGCTCATCCCTACAGGGCCATTACAAACAT                                |
| Tet1_mut_rev             | ATGTTGTGAATGGCCCTGTAGGGATGAGCAC                                |
| dCas9-lenti-T2A-puro_fwd | ATTCAGGTGTCGTGACGTACGGCCACCATGGATAAAAAGTATTCTATTGGTT<br>TAG    |
| dCas9-lenti-T2A-puro_rev | GCCCTCTCCACTGCCTGTACAGTTAATTAACATATCGAGATCGAAATCG              |
| amp_gRNA_pLKO_fwd        | CCATTTCGATTAGTGAACGGATC                                        |

|                                     |                                                         |
|-------------------------------------|---------------------------------------------------------|
| amp_gRNA_rev                        | CGACTCGGTGCCACTTTTTTC                                   |
| libgen_fwd                          | CTTGTGGAAAGGACGAAACA                                    |
| libgen_rev                          | GCCTTATTTTAACTTGCTATTTCTAGC                             |
| Sox1_BiS_fwd<br>chr8:12395267       | TCGTCCGGCAGCGTCAGATGTGTATAAGAGACAGTTTTGGGTTTTTAATTTAAT  |
| Sox1_BiS_rev<br>chr8:12395400       | GTCTCGTGGGCTCGGAGATGTGTATAAGAGACAGAACCACACTACTTCCTAAC   |
| Actcl_BiS_fwd<br>chr2:114052775     | TCGTCCGGCAGCGTCAGATGTGTATAAGAGACAGGTTGGATTTAGTTGGGTTGG  |
| Actcl_BiS_rev<br>chr2:114052908     | GTCTCGTGGGCTCGGAGATGTGTATAAGAGACAGATAACAAATCAAAAACCC    |
| Oct4_BiS_1_fwd<br>Chr17:35505654    | TCGTCCGGCAGCGTCAGATGTGTATAAGAGACAGGGAGTGGTTTTAGAAATAA   |
| Oct4_BiS_1_rev<br>Chr17:35505825    | GTCTCGTGGGCTCGGAGATGTGTATAAGAGACAGCACCCCTACCTTAAATCAC   |
| Oct4_BiS_2_fwd<br>Chr17:35505829    | TCGTCCGGCAGCGTCAGATGTGTATAAGAGACAGGGTGAGAGGATTTTGAAG    |
| Oct4_BiS_2_rev<br>Chr17:35506148    | GTCTCGTGGGCTCGGAGATGTGTATAAGAGACAGAAAAACAAAATATAAAAA    |
| Nkx2-2_BiS_1_fwd<br>Chr2: 147186667 | TCGTCCGGCAGCGTCAGATGTGTATAAGAGACAGTTTTTAGAGTAAGATGAGAG  |
| Nkx2-2_BiS_1_rev<br>Chr2: 147186882 | GTCTCGTGGGCTCGGAGATGTGTATAAGAGACAGATATTAATAAAAAAATTCTTT |
| Nkx2-2BiS_2_fwd<br>Chr2: 147186852  | TCGTCCGGCAGCGTCAGATGTGTATAAGAGACAGATAGAAAGGAGGGGGTAA    |
| Nkx2-2_BiS_2_rev<br>Chr2: 147187043 | GTCTCGTGGGCTCGGAGATGTGTATAAGAGACAGTAAATCTTATTTAAAAAAC   |
| NeuroD4_BiS_fwd<br>chr10:130280852  | TCGTCCGGCAGCGTCAGATGTGTATAAGAGACAGGGAGGGGTTATTTTGTGGG   |
| NeuroD4_BiS_rev<br>chr10:130281135  | GTCTCGTGGGCTCGGAGATGTGTATAAGAGACAGCACTACCAAAAATACCTTC   |

|                                  |                                                             |
|----------------------------------|-------------------------------------------------------------|
|                                  | ATATCAATAC                                                  |
| Ngn2_BiS_1_fwd<br>chr3:127632608 | TCGTCGGCAGCGTCAGATGTGTATAAGAGACAGTAATGAGTTGTTGAAAGGG<br>AG  |
| Ngn2_BiS_1_rev<br>chr3:127632690 | GTCTCGTGGGCTCGGAGATGTGTATAAGAGACAGCAACTAACCAATCAATAT<br>TCC |
| Ngn2_BiS_2_fwd<br>chr3:127632872 | TCGTCGGCAGCGTCAGATGTGTATAAGAGACAGTGATTAGATAAAGGGGGG<br>A    |
| Ngn2_BiS_2_rev<br>chr3:127633074 | GTCTCGTGGGCTCGGAGATGTGTATAAGAGACAGACCCCCTCTCACCTACCC<br>TT  |

Supplementary Table 2: Domain cloning

| Domain                | Aminoacids | Template              | Primers used                                         |
|-----------------------|------------|-----------------------|------------------------------------------------------|
| Tet1 catalytic domain | 1418-2136  | Addgene plasmid 39454 | Tet1_fwd<br>Tet1_int_rev<br>Tet1_int_fwd<br>Tet1_rev |
| JMJD2a                | 1-350      | Addgene plasmid 38846 | JMJD2a_fwd<br>JMJD2a_rev                             |
| Set7                  | 52-366     | Addgene plasmid 24082 | Set7_fwd<br>Set7_rev                                 |
| P300                  | 1284-1673  | Addgene plasmid 23252 | P300_fwd<br>P300_rev                                 |

Supplementary Table 3: gRNA sequences

| gRNA name | gRNA construct | Sequence             |
|-----------|----------------|----------------------|
| Sox1_1    | S1-9           | GTTAATCATTCGGAGCGCGC |
| Sox1_9    | S1-9           | GCGCGGGCGGCGGAGCAAGG |
| Sox1_4    | S4-7           | GAGGCAAAGGGGGCGAGCTC |
| Sox1_7    | S4-7           | GGGGGGGAACAAGGGCAGGA |
| Actcl_1   | A1-9           | GGCTCCAAGAATGGCCTCAG |
| Actcl_2   | A1-9           | GGGAGGGGCAGGCCAGCAAG |



|           |               |                      |
|-----------|---------------|----------------------|
| Sox1_1    | SoxProm       | GTTAATCATTCGGAGCGCGC |
| Sox1_2    | SoxProm       | GCGGGCGGGGAGAGGCAAAG |
| Sox1_3    | SoxProm       | GCGCGGGCGGGGAGAGGCAA |
| Sox1_4    | SoxProm       | GAGGCAAAGGGGGCGAGCTC |
| Sox1_5    | SoxProm       | GCCGCCGCGCGCGCGCTC   |
| Sox1_7    | SoxProm       | GGGGGGGAACAAGGGCAGGA |
| Sox1_9    | SoxProm       | GCGCGGGCGGCGGAGCAAGG |
| Oct4_1    | Oct4_STAgR    | GGATGTTTTAGGCTCTCCAG |
| Oct4_2    | Oct4_STAgR    | CATCGCACCAAAAGCCTGT  |
| Nkx2-2_1  | Nkx2-2_STAgR  | GCCCTCTAGAGCAAGATGAG |
| Nkx2-2_2  | Nkx2-2_STAgR  | TCCTTTGTATGTAAATACTG |
| NeuroD4_1 | NeuroD4_STAgR | TGACTCTACTACCCTACATG |
| NeuroD4_2 | NeuroD4_STAgR | GTGACTCTACTACCCTACAT |
| Ngn2_1    | Ngn2_STAgR    | CCACCAATCACAATAGACAG |
| Ngn2_2    | Ngn2_STAgR    | AGTGTTCCCGGGACTCCGGG |

Supplementary Table 4: qPCR primer

| primer         | Sequence              |
|----------------|-----------------------|
| Sox1_qPCR_fwd  | AGACAGCGTGCCTTTGATTT  |
| Sox1_qPCR_rev  | TGGGATAAGACCTGGGTGAG  |
| eGFP_qPCR_fwd  | GAAGCAGCACGACTTCTTCAA |
| eGFP_qPCR_rev  | AAGTCGATGCCCTCAGCTC   |
| Gapdh_qPCR_fwd | TTGCAGTGGCAAAGTGGAGA  |
| Gapdh_qPCR_rev | CGTTGAATTTGCCGTGAGTG  |
| Actcl_qPCR_fwd | ATGTGTGACGACGAGGAGAC  |
| Actcl_qPCR_rev | CGGACAATTTACGTTCCAGCA |
| Gapdh_ChIP_fwd | ACCAGGGAGGGCTGCAGTCC  |
| Gapdh_ChIP_rev | TCAGTTCGGAGCCCACACGC  |
| Oct4_ChIP_fwd  | CCCCAGGGAGGTTGAGAGTT  |

|                |                      |
|----------------|----------------------|
| Oct4_ChIP_rev  | AAGGGCTAGGACGAGAGGGA |
| Sox1_ChIP_fwd  | GCTGAGCTGAGTGCAAAGTG |
| Sox1_ChIP_rev  | CCCTGGGTCGTGTTTAAATG |
| Cas9_qPCR_fwd  | TCGTAGGGACCGCACTCATT |
| Cas9_qPCR_rev  | TCGCTTTTCGCGATCATCTT |
| Actc1_ChIP_fwd | GGCCATATAGGGAGCTAGGG |
| Actc1_ChIP_rev | AGAGCAATAAGCCCACTCCA |

Supplementary Table 5: Antibodies

| Antigen    | Company     | Catalog #    | Application  | Dilution |
|------------|-------------|--------------|--------------|----------|
| Sox1       | abcam       | ab87775      | Western Blot | 1:1000   |
|            |             |              | ICC          | 1:400    |
| Actcl      | proteintech | 66125-1-1G   | ICC          | 1:250    |
| a-Tubulin  | Sigma       | T5168        | Western Blot | 1:2000   |
| GFAP       | Sigma       | G3893        | ICC          | 1:500    |
| Tuj1       | Sigma       | T8660        | ICC          | 1:1000   |
| Cas9       | Novus       | NBP2-36440   | Western Blot | 1:500    |
| Flag-M2    | Sigma       | F3165        | ChIP         | 1:1000   |
| H3K9me3    | abcam       | ab8898       | ChIP         | 1:500    |
| H3K27me3   | Diagenode   | C15410195    | ChIP         | 1:1000   |
| H3         | abcam       | ab1791       | ChIP         | 1:1000   |
| IgG        | Diagenode   | C15400001-15 | ChIP         | 1:1000   |
| NeuroD4    | Novus       | NBP2-13932   | ICC          | 1:500    |
| Nkx2-2     | R&D Systems | MAB8162      | ICC          | 1:500    |
| Ngn2       | R&D Systems | MAB3314      | ICC          | 1:1000   |
| Oct4       | Abcam       | Ab181557     | ICC          | 1:300    |
| E-Cadherin | Invitrogen  | 14-3249-82   | ICC          | 1:300    |
| Nestin     | Millipore   | MAB5326      | ICC          | 1:500    |

|           |                 |            |     |        |
|-----------|-----------------|------------|-----|--------|
| Notch1    | Invitrogen      | MA5-11961  | ICC | 1:500  |
| Occludin  | Novus           | NBP1-87402 | ICC | 1:250  |
| Prominin  | Biolegend       | 141201     | ICC | 1:300  |
| Zo-1      | Santa-Cruz      | Sc-10804   | ICC | 1:500  |
| Map2      | Merck/Millipore | MAB378     | ICC | 1:300  |
| vGlut1    | Millipore       | AB5905     | ICC | 1:300  |
| Calbindin | Merck/Millipore | AB1778     | ICC | 1:1000 |

## Supplementary Methods

### qRT-PCR:

qRT-PCR primers can be found in Supplementary table 4. RNA from *in vitro* cultures was extracted using the RNeasy Mini Kit (Qiagen, 74104) according to manufacturer's protocol. RNA from tissue was extracted using the Extractme total RNA kit (DNAGDANSK, EM09.1) according to manufacturer's protocol. DNase treatment and reverse transcription were performed with the Maxima first strand cDNA synthesis kit (ThermoFisher, K1671), and analyzed using PowerUp™ Sybr Green Master Mix (ThermoFisher, A25742) on an Applied Biosystems™ QuantStudio™ 6 Flex Real-Time PCR System. Data are quantified as mRNA fold change normalized to *Gapdh*. Samples were analyzed in triplicates.

### Lentivirus generation:

Lentiviral vectors were produced by transient co-transfection of HEK 293T cells with lentiviral packaging plasmid pCMVDR8.9, pseudotyping plasmid pVSVG and the lentiviral expression plasmid. 96 hours after transfection the supernatant was harvested, centrifuged at 4500 rcf for 10 minutes and filtered through a 0.45 µm filter (Millipore, SLHV033RS). Viral particles were pelleted at 27,000 rcf at 4°C for 2 hours, resuspended in TBS-5 (containing 50 mM Tris-HCl (pH 7.8), 130 mM NaCl, 10 mM KCl, and 5 mM MgCl<sub>2</sub>) and stored at -80°C. Viral titers were measured for gRNA vectors (ca 10<sup>8</sup> infectious particles per ml on neural progenitor cells).

Flow cytometry and fluorescence activated cell sorting (FACS):

For flow analysis and cell sorting, cells were detached using Accutase (Sigma-Aldrich, A6964), washed twice with PBS and treated with eBioscience™ Fixable viability dye eFlour™ 660 (ThermoFisher, 65-0864-14) for 10 minutes at 37°C. Cells were analyzed and sorted in a FACSAriaIII™ (Becton Dickinson) flow cytometer. Cells were sorted at a flow rate of 5 (arbitrary units; corresponding to ~42µl/min) into cell culture medium supplied with 5% BSA and cultured under normal conditions immediately after sorting. The gating strategy is depicted in Supplementary Figure 1.

Western Blotting:

For western blot antibodies and PAGE gel concentrations see Supplementary Table 5. To extract proteins from cultured cells, cells were detached using Accutase and washed once in PBS. Proteins were extracted using RIPA buffer (SIGMA-ALDRICH, R0278) with 1x protease inhibitor cocktail. Protein concentrations were measured using a Bradford assay (Bio-Rad, 5000201). Around 40µg protein was loaded per well on a Polyacrylamide Protein Gel, separated by electrophoresis and blotted on a 0.2µm polyvinylidene membrane (ThermoFisher, LC2002) (activated with methanol). Membranes were incubated with the primary antibodies (concentrations see Supplementary Table 5), overnight at 4°C. Incubation with secondary antibodies and detection were performed according to routine laboratory practices. Uncropped blots are shown below.

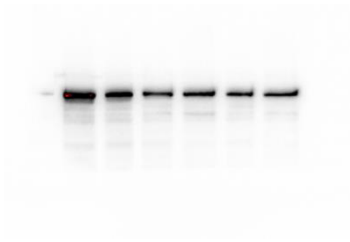

Uncropped Image of the dCas9 Western Blot

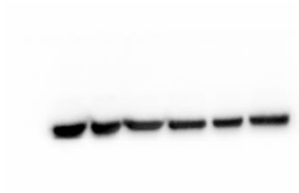

Uncropped Image of the loading control (alpha-Tubulin) for the dCas9 Western Blot

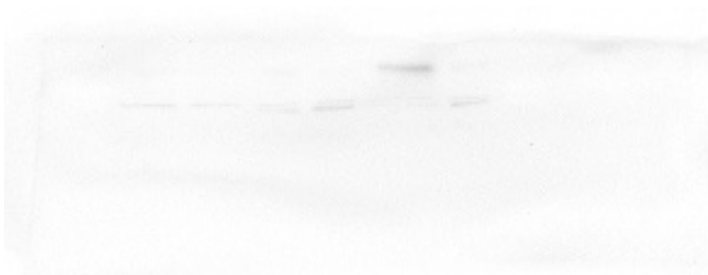

Uncropped Image of the Sox1 Western Blot

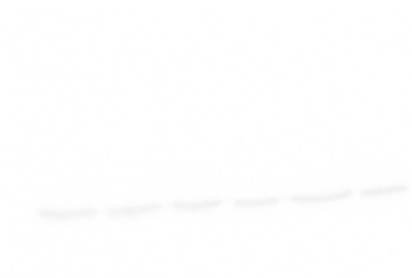

Uncropped Image of the loading control (alpha-Tubulin) for the Sox1 Western Blot

Differentiation assay:

To induce differentiation of NPCs, 40000 cells per well were plated on coverslips in 24-well plates. 3 wells were used per condition Cells were cultured in NeuroCult™ Proliferation kit

supplemented with 1% (v/v) FCS and 1 $\mu$ g/ml Laminin, but without growth factors. Medium was exchanged every other day. After 7 days in differentiation condition, cells were fixed and immunocytochemistry was performed.

For assessment of neuronal subtype analysis, cells were differentiated for an additional 14 days. Starting at day 7, differentiation medium was supplemented with 10ng/ml NT3 (ThermoFisher Scientific, PHC7036), BDNF (Gibco, PHC7074), GDNF (Gibco, PHC7041), and cAMP (Sigma Aldrich, A6885), and exchanged the medium every other day. Cells were fixed after a total of 21 days of differentiation.

Immunofluorescence staining and microscopy analysis:

Primary and secondary antibodies are listed in Supplementary Table 5. For immunocytochemistry (ICC), cells were plated on PDL coated glass coverslips. Cells were fixed in 4% paraformaldehyde in PBS for 10 minutes at room temperature. Cells were first permeabilized in 0.5% Triton X-100 (Biomol, T8655.1) in PBS for 15 minutes at room temperature, followed by treatment in 3% BSA and 0.5% Triton X-100 in PBS for 30 minutes at room temperature. Cells were incubated in primary antibodies in 3% BSA (SIGMA-ALDRICH, A2153-1KG) and 0.5% Triton X-100 in PBS over night at 4°C. Cells were washed three times in PBS and incubated in appropriate secondary antibodies conjugated to fluorophores for 2 h in the dark at room temperature, followed by three washes in PBS and treatment with DAPI. Coverslips were mounted onto glass slides with Aqua-Poly/Mount (Polysciences, 18606-20). Stainings were analyzed using an epifluorescence microscope (Zeiss). Countings were performed on three randomly selected views per coverslip using a 10x objective. Pictures were analyzed using Fiji (National Institute of Health, USA,

**RRID:SCR\_002285**) software. Values are calculated as mean of biological replicates. All samples of a biological replicate were treated equally and with linear image processing methods only.

#### RNA sequencing-library construction and sequencing:

Per condition, the RNA of 100000 cells of three independent biological samples was isolated using the PicoPure<sup>TM</sup> RNA Isolation Kit (ThermoFisher, KIT0204) according to manufacturer's protocol. The quality of RNA samples was determined with the Agilent Bioanalyzer 2100, accepting RNA integrity numbers (RIN) of >8. 4.5ng RNA per sample was used as input for cDNA synthesis. cDNA synthesis, amplification and purification of amplified cDNA was performed using the SMART-Seq<sup>TM</sup> v4 Ultra<sup>TM</sup> Low Input RNA Kit (TaKaRa, 634894) and Agencourt AMPure XP magnetic beads (Beckman Coulter, A63881) according to manufacturer's protocol. A total of 8 cycles was used for cDNA amplification. Quality of cDNA was validated using the Agilent Bioanalyzer 2100. Shearing and library preparation were performed according to the SMART-Seq<sup>TM</sup> v4 Ultra<sup>TM</sup> Low Input RNA Kit for Sequencing User Manual, using the Covaris S220 sonicator and the MicroPlex Library Preparation Kit v2 (Diagenode, C05010012). cDNA concentration and quality were assessed using the Agilent Bioanalyzer 2100. Samples were then pooled at equimolar amounts to a final concentration of 5nM. The cDNA library was sequenced by the Sequencing Core Facility of the Helmholtz-Zentrum München on a HiSeq4000 (Illumina). The sequences were aligned using the STAR v2.6 RNA-seq aligner (**RRID:SCR\_015899**), expression calculated using RSEM v1.1.14 (**RRID:SCR\_013027**) and analyzed using R Studio v 1.1.442 (**RRID:SCR\_000432**). For comparative analysis, all transcripts were excluded that did not have at least 5 counts per



million in either the baseline or the Sox1 positive NPC samples. The remaining genes were compared between the two conditions and significantly regulated genes selected according to an adjusted p-value <0.05 and an FDR value <0.01. Significantly regulated genes are listed in Supplementary Table 7. From these genes, the 200 most upregulated and 200 most downregulated genes were selected. The expression changes of those genes were calculated for each of the three samples of each experimental condition (Sox1 positive NPCs, NSCs, NRs), compared to the mean expression of the control group (baseline NPCs), and a heatmap was generated, based on these values. Raw and processed data has been uploaded to GEO (accession number GSE119480).

#### ChIP-qPCR:

ChIP-grade antibodies and qPCR primers are listed in Supplementary Table 5 and Supplementary Table 4 respectively. To extract Chromatin for immunoprecipitation,  $5 \times 10^6$  cells were washed twice with PBS and fixed for 8 minutes at room temperature in 1% methanol free formaldehyde (ThermoFisher, 28906) in PBS. Formaldehyde was quenched by addition of 57  $\mu$ l 1.25M glycine and incubation for 5 minutes at room temperature. Cells were washed twice with cold PBS and incubated in hypotonic buffer (containing 10mM Tris-HCl, 2mM MgCl<sub>2</sub>, 0.5% Triton X-100 and 1x Protease inhibitor cocktail) for 10 minutes on ice. After centrifugation at 500g and 4°C for 5 minutes, nuclei were resuspended in lysis buffer (containing 1% (v/v) SDS, 10mM EDTA, 50mM Tris-HCl, and 1x Protease inhibitor cocktail) and incubated on ice for 30 minutes. Chromatin was sheared with the Bioruptor™ (Diagenode), using 5 cycles of 30 seconds on and 30 seconds off. Chromatin immunoprecipitation and purification of genomic DNA was performed on the IP-Star®

Compact (Diagenode) employing the Auto iDeal ChIP-seq kit for Histones (Diagenode, C01010171) according to manufacturer's protocol. Samples were analyzed in triplicates using PowerUp™ Sybr Green Master Mix on an Applied Biosystems™ QuantStudio™ 6 Flex Real-Time PCR System, and quantified over the input sample.

Bisulfite and oxidative bisulfite Sequencing:

Primers for library preparation are listed in Supplementary Table6. Genomic DNA was extracted from 200000 cells per sample using the DNeasy Blood and Tissue kit (Quiagen, 69504) and DNA content was measured with a NanoDrop. For analysis of the total amount of methylation and hydroxymethylation, bisulfite conversion was performed directly after DNA preparation from genomic DNA. For analysis of DNA methylation in specific, oxidation with  $\text{KRuO}_4$  was performed prior to conversion.

For oxidation, 1 $\mu\text{g}$  DNA was denatured in 0.05M NaOH (Sigma Aldrich, 1310-73-2) at 37°C for 30 minutes. During incubation, Micro-Bio-Spin P-6 SCC columns (Bio-Rad, 7326201) were washed four times by each time adding 500 $\mu\text{l}$   $\text{H}_2\text{O}$ , centrifugation at 1000 x rcf for 1 minute, and discarding the flow-through. After denaturation, DNA was loaded on a prepared Micro-Bio-Spin column and centrifuged for 8 minutes at 1000 x rcf. DNA was snap cooled and then oxidized for 1 hour with 15mM  $\text{KRuO}_4$  (Sigma Aldrich, 10378-50-4) in 0.05M NaOH. DNA was then purified by loading on a prepared Micro-Bio-Spin column and centrifugation for 8 minutes at 1000 x rcf.

The DNA was bisulfite converted using the EZ DNA Methylation-Gold Kit (Zymo, D5005) and the resulting modified DNA immediately used as template for the following PCR. The loci of interest were amplified by PCR, using HotStar Taq (Qiagen, 203203). The PCR mix contained 2.5µl of 10x buffer, 1µl of 10nM dNTPs, 0.25µl per primer, 100ng DNA, and 0.5µl Taq Polymerase. The PCR products were purified using Agencourt AMPure XP magnetic beads according to manufacturer's protocol. To attach the Illumina sequencing adapters, an adapter PCR was performed, using primer sequences from the Nextera DNA Library Preparation Kit (Illumina, FC-121-1012). The PCR mix contained 1µl DNA, 0.75µl of each indexing primer, 12.5µl of Phusion® High-Fidelity PCR Master Mix, and 10µl water. Samples were purified using Agencourt AMPure XP magnetic beads according to manufacturer's protocol. Samples were pooled and analysed at the Agilent Bioanalyzer 2100. The library pool was diluted to 5nM and sequenced by the sequencing core facility of the Helmholtz-Zentrum München on a HiSeq4000 (Illumina). The sequences were aligned and analyzed with the Bismark Bisulfite Mapper v0.15.0 (Babraham Institute, **RRID:SCR\_005604**). Raw and processed data has been uploaded to SRA (accession numbers PRJNA490128, PRJNA522700, and PRJNA522707).
